# Supplementary material for: A Novel BC2N Monolayer as Anode Material for Li-Ion Battery
Source: MDPI journal article supplement (doi:10.3390/batteries9060315), 2023-06-06
Supplement: s1 [file s1]

## Supporting information

### **A Novel BC<sub>2</sub>N monolayer as anode material for Li-ion battery**

Xiaowei Chen<sup>a,b</sup> <sup>†\*</sup>, Jiahe Lin<sup>a,b</sup> <sup>†</sup>, Qiubao Lin<sup>a,b</sup>, Renquan Li<sup>a</sup>, Hongsheng He<sup>a</sup>,

<sup>a</sup>*School of Science, Jimei University, Xiamen, 361021, China*

<sup>b</sup>*semiconductor industry and technology research Institute, Jimei University, Xiamen, 361021, China*

<sup>†</sup>Xiaowei Chen and Jiahe Lin contributed equally to this work.

\* To whom correspondence should be addressed.

E-mail: chenxiaowei@jmu.edu.cn

## Computational Methods

The density functional theory (DFT) calculations were carried out using the VASP code<sup>1</sup>. The electron-ion interaction was described using the projector-augmented wave (PAW)<sup>2</sup>. We used the generalized gradient approximation (GGA) in Perdew-Burke-Ernzerhof functional (PBE) to describe the exchange-correlation functional<sup>3-4</sup>. To take the van der Waals interactions into account, the D2-Grimme dispersion correction<sup>5</sup> was used. We used a plane-wave energy cutoff of 500 eV for all the calculations. To reduce the artificial interactions between neighboring layers, we employed a large vacuum slab ( $\sim 26$  Å) along the z-direction. We employed a Gaussian smearing technique with a small SIGMA value of 0.05 for all our calculations. For geometric optimization, we use  $12 \times 12 \times 1$   $\Gamma$ -centered k-meshes. The cell's volume, shape, and all of its atoms were completely relaxed until the residual force was less than 0.01 eV/Å. The electronic structure and optical characteristics of BC<sub>2</sub>N monolayer were acquired using the Heyd, Scuseria and Ernzerhof functional (HSE06)<sup>6</sup>. For 3D band structure calculation, we used  $40 \times 40 \times 1$   $\Gamma$ -centered k-meshes. To obtain detailed and accurate phonon spectra data for BC<sub>2</sub>N, we utilized the density functional perturbation theory (DFPT) method in conjunction with the Phonopy software package<sup>7</sup>. We used a  $4 \times 4 \times 1$  supercell of BC<sub>2</sub>N for phonon spectra calculation. To further analyze the bonding properties of BC<sub>2</sub>N, crystal orbital Hamilton population (COHP) calculations were performed using the lobster code<sup>8</sup>. We use a  $3 \times 3 \times 1$  supercell of BC<sub>2</sub>N monolayer to perform the Ab initio molecular dynamics (AIMD) simulations. The Nose-Hoover method was used to solve the ionic motion equations. The time step of AIMD simulation is set to be 1.0 fs. We equilibrated the system at 300, 450 and 600 K for 10 ps in canonical ensemble (NVT). The climbing image nudged elastic band (CI-NEB) method<sup>9</sup> was utilized to explore the pathways and energy barriers associated with the diffusion of Li in the given system, which yielded important information about the underlying mechanism and kinetics of Li diffusion. We used Vaspkit code to derive the mechanical and optical properties of BC<sub>2</sub>N monolayer from the raw VASP calculation results<sup>10</sup>.

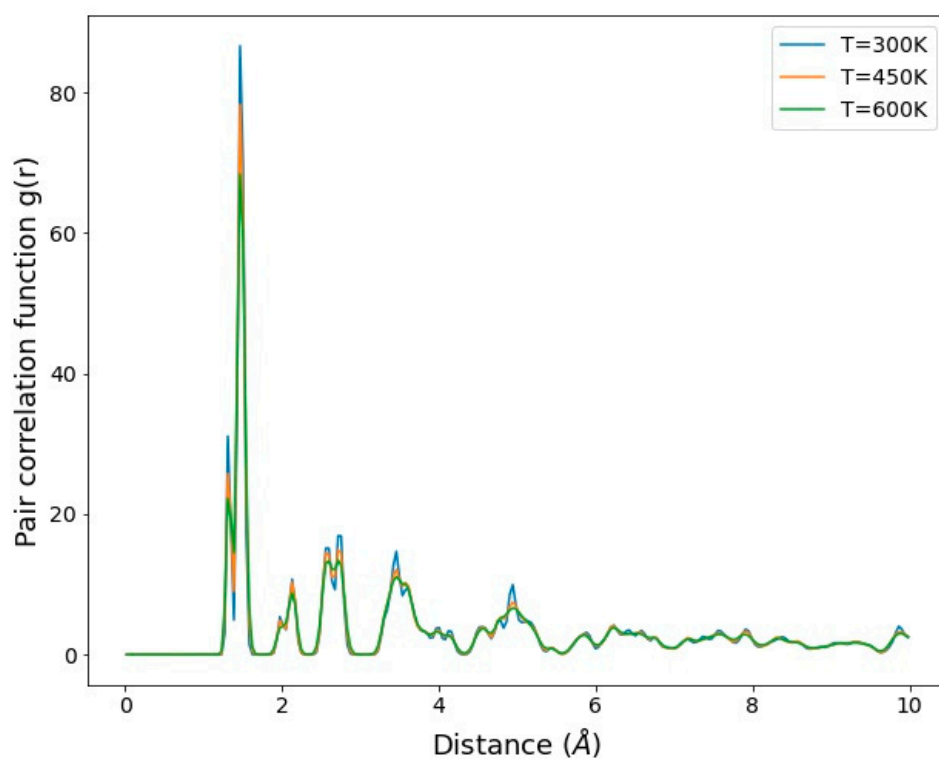

Figure S1 Pair correlation function of BC<sub>2</sub>N monolayer.

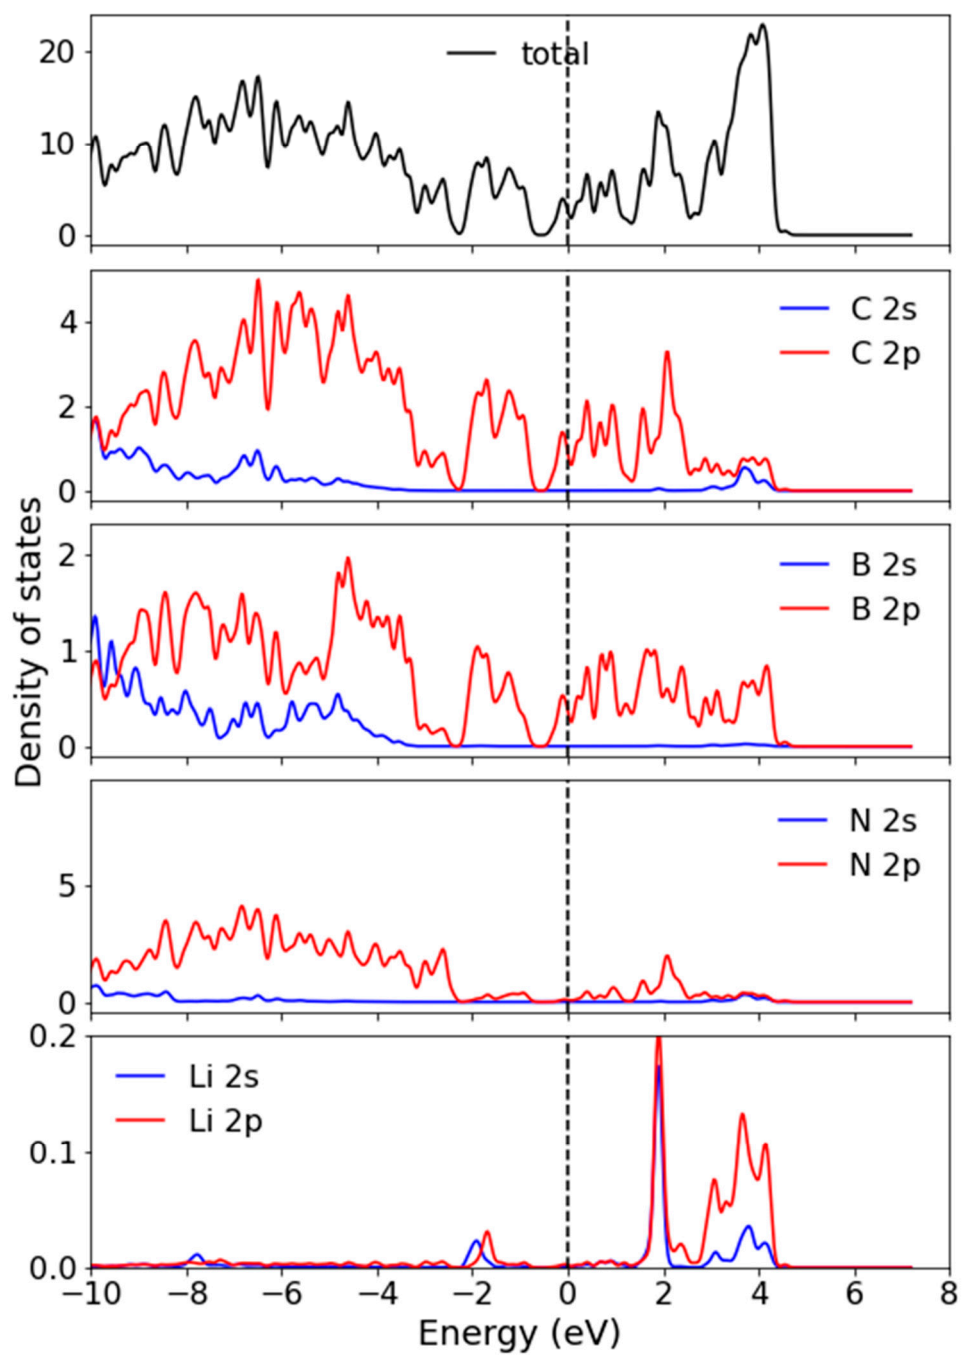

Figure S2 The density of state of Li adsorb on BC<sub>2</sub>N monolayer.

Table S1 The -ICOHP value for the C1-C2, C-B, C-N and N-B bonds.

| C1-C2 (eV) | C-B (eV) | C-N (eV) | B-N (eV) |
|------------|----------|----------|----------|
| 8.78       | 8.25     | 12.09    | 7.54     |

Table S2 Bader charge of BC<sub>2</sub>N monolayer without and with Li adsorption. The C, B and N bader charge of Li adsorption BC<sub>2</sub>N monolayer were selected near the Li atom.

| C1   | C2    | B    | N     | Li   |
|------|-------|------|-------|------|
| 0.51 | -0.48 | 1.57 | -1.6  |      |
| 0.53 | -0.75 | 1.35 | -1.44 | 0.75 |

## References

1. Kresse, G.; Furthmüller, J., Efficient Iterative Schemes for Ab Initio Total-Energy Calculations Using a Plane-Wave Basis Set. *Phys. Rev. B* **1996**, *54*, 11169.
2. Blöchl, P. E., Projector Augmented-Wave Method. *Phys. Rev. B* **1994**, *50*, 17953.
3. Perdew, J. P.; Burke, K.; Wang, Y., Generalized Gradient Approximation for the Exchange-Correlation Hole of a Many-Electron System. *Phys. Rev. B* **1996**, *54*, 16533-16539.
4. Perdew, J. P.; Burke, K.; Ernzerhof, M., Generalized Gradient Approximation Made Simple. *Phys. Rev. Lett.* **1996**, *77*, 3865-3868.
5. Grimme, S.; Antony, J.; Ehrlich, S.; Krieg, H., A Consistent and Accurate Ab Initio Parametrization of Density Functional Dispersion Correction (Dft-D) for the 94 Elements H-Pu. *The Journal of Chemical Physics* **2010**, *132*, 154104.
6. Paier, J.; Marsman, M.; Hummer, K.; Kresse, G.; Gerber, I. C.; Ángyán, J. G., Screened Hybrid Density Functionals Applied to Solids. *The Journal of Chemical Physics* **2006**, *124*, 154709.
7. Parlinski, K.; Li, Z. Q.; Kawazoe, Y., First-Principles Determination of the Soft Mode in Cubic ZrO<sub>2</sub>. *Phys. Rev. Lett.* **1997**, *78*, 4063-4066.
8. Chen, L.; Yang, M.; Kong, F.; Du, W.; Guo, J.; Shu, H., Penta-Bcn Monolayer with High Specific Capacity and Mobility as a Compelling Anode Material for Rechargeable Batteries. *Phys. Chem. Chem. Phys.* **2021**, *23*, 17693-17702.
9. Henkelman, G.; Uberuaga, B. P.; Jónsson, H., A Climbing Image Nudged Elastic Band Method for Finding Saddle Points and Minimum Energy Paths. *The Journal of Chemical Physics* **2000**, *113*, 9901-9904.
10. Wang, V.; Xu, N.; Liu, J.-C.; Tang, G.; Geng, W.-T., Vaspkit: A User-Friendly Interface Facilitating High-Throughput Computing and Analysis Using Vasp Code. *Comput. Phys. Commun.* **2021**, *267*, 108033.
